# Supplementary material for: Structural and functional impact of non-synonymous SNPs in the CST complex subunit TEN1: structural genomics approach
Source: PubMed Central journal article supplement (PMC6522806; doi:10.1042/bsr20190312), 2019-05-15
Supplement: BSR-2019-0312_suppS4.pdf [file BSR-2019-0312_suppS4.pdf]

**Table S1:** Sequence-based predictions of deleterious nsSNPs in *TEN1* gene using SIFT, PolyPhen-2 and PROVEAN.

| S. No. | Variant ID   | Variants | Sift_class  | SIFT | Polyphen2_class   | PolyPhen-2 | PROVEAN Score | Remark      |
|--------|--------------|----------|-------------|------|-------------------|------------|---------------|-------------|
| 1.     | rs1322628164 | M2V      | Deleterious | 0    | benign            | 0.018      | -2.590        | Deleterious |
| 2.     | rs892524367  | P4L      | Deleterious | 0    | probably damaging | 1          | -6.734        | Deleterious |
| 3.     | rs989236496  | P6A      | Tolerated   | 0.64 | benign            | 0.21       | -0.289        | Neutral     |
| 4.     | rs1212831970 | Y9C      | Deleterious | 0    | probably damaging | 0.959      | -5.335        | Deleterious |
| 5.     | rs1247295822 | P12L     | Tolerated   | 0.35 | probably damaging | 1          | -5.470        | Deleterious |
| 6.     | rs1333358260 | W13G     | Deleterious | 0.01 | probably damaging | 1          | -8.140        | Deleterious |
| 7.     | rs1224481693 | E14D     | Deleterious | 0.01 | probably damaging | 0.999      | -2.043        | Neutral     |
| 8.     | rs1175908725 | V15 F    | Deleterious | 0    | possibly damaging | 0.816      | -3.150        | Deleterious |
| 9.     | rs759172427  | A17V     | Tolerated   | 0.07 | possibly damaging | 0.786      | -1.731        | Neutral     |
| 10.    | rs1328038606 | G18V     | Deleterious | 0.04 | probably damaging | 0.988      | -4.522        | Deleterious |
| 11.    | rs964588646  | G23E     | Deleterious | 0    | probably damaging | 1          | -6.549        | Deleterious |
| 12.    | rs376979590  | T25M     | Deleterious | 0    | possibly damaging | 0.855      | -3.804        | Deleterious |
| 13.    | rs1262136645 | L26P     | Deleterious | 0    | probably damaging | 0.985      | -5.011        | Deleterious |
| 14.    | rs1392752852 | T28I     | Deleterious | 0    | probably damaging | 1          | -3.813        | Deleterious |
| 15.    | rs1485869353 | F29Y     | Tolerated   | 0.11 | benign            | 0.149      | -1.914        | Neutral     |
| 16.    | rs1223059981 | D36N     | Deleterious | 0.04 | benign            | 0.386      | -3.702        | Deleterious |
| 17.    | rs1250997925 | R41S     | Deleterious | 0.04 | benign            | 0.099      | -2.684        | Deleterious |
| 18.    | rs1481928740 | V42L     | Deleterious | 0.04 | benign            | 0.05       | -1.596        | Neutral     |
| 19.    | rs1178755431 | L44V     | Deleterious | 0.02 | possibly damaging | 0.652      | -1.737        | Neutral     |
| 20.    | rs1251492109 | M45V     | Tolerated   | 0.14 | benign            | 0          | 0.371         | Neutral     |
| 21.    | rs1268278855 | M45T     | Tolerated   | 1    | benign            | 0          | 1.648         | Neutral     |
| 22.    | rs11544990   | A46S     | Tolerated   | 0.15 | benign            | 0.444      | -1.209        | Neutral     |
| 23.    | rs750169662  | H48Y     | Deleterious | 0.03 | benign            | 0.029      | -3.298        | Deleterious |
| 24.    | rs1425396642 | G49R     | Tolerated   | 0.3  | benign            | 0.062      | -1.167        | Neutral     |
| 25.    | rs1055013538 | D51N     | Tolerated   | 0.44 | benign            | 0.005      | -1.520        | Neutral     |
| 26.    | rs1412009927 | C58Y     | Tolerated   | 0.17 | probably damaging | 0.978      | -4.679        | Deleterious |
| 27.    | rs1373602232 | T59I     | Deleterious | 0    | probably damaging | 0.972      | -5.579        | Deleterious |
| 28.    | rs1360895135 | L61F     | Tolerated   | 0.64 | possibly damaging | 0.654      | -1.070        | Neutral     |
| 29.    | rs977512123  | L61M     | Deleterious | 0    | probably damaging | 0.995      | -1.298        | Neutral     |
| 30.    | rs1032051988 | L61W     | Deleterious | 0.01 | probably damaging | 0.997      | -3.746        | Deleterious |
| 31.    | rs889310547  | P64T     | Deleterious | 0    | probably damaging | 1          | -7.018        | Deleterious |
| 32.    | rs543068875  | H66R     | Deleterious | 0.03 | benign            | 0          | -0.298        | Neutral     |
| 33.    | rs998232737  | A67T     | Tolerated   | 0.07 | possibly damaging | 0.896      | -2.281        | Neutral     |

|     |              |       |             |      |                   |       |        |             |
|-----|--------------|-------|-------------|------|-------------------|-------|--------|-------------|
| 34. | rs998232737  | A67S  | Tolerated   | 0.1  | probably damaging | 0.955 | -1.368 | Neutral     |
| 35. | rs200875806  | Q68H  | Tolerated   | 0.38 | benign            | 0.03  | -0.004 | Neutral     |
| 36. | rs975857712  | V69M  | Tolerated   | 0.16 | benign            | 0.034 | -1.133 | Neutral     |
| 37. | rs951187486  | G70A  | Deleterious | 0    | probably damaging | 0.92  | -4.795 | Deleterious |
| 38. | rs1180274799 | G70S  | Deleterious | 0    | possibly damaging | 0.89  | -4.344 | Deleterious |
| 39. | rs1445270614 | Y73C  | Deleterious | 0    | probably damaging | 0.991 | -8.386 | Deleterious |
| 40. | rs374268204  | I74M  | Tolerated   | 0.74 | benign            | 0.028 | 0.896  | Neutral     |
| 41. | rs370881785  | I74V  | Tolerated   | 0.37 | benign            | 0.001 | -0.129 | Neutral     |
| 42. | rs929018097  | V75I  | Deleterious | 0.02 | benign            | 0.322 | -0.561 | Neutral     |
| 43. | rs1358892195 | G77R  | Deleterious | 0    | probably damaging | 0.997 | -7.789 | Deleterious |
| 44. | rs1300674402 | E78D  | Tolerated   | 0.06 | benign            | 0.059 | -2.486 | Neutral     |
| 45. | rs1384576801 | L79I  | Tolerated   | 0.48 | possibly damaging | 0.69  | -0.754 | Neutral     |
| 46. | rs1384576801 | L79F  | Tolerated   | 0.09 | benign            | 0.162 | -1.947 | Neutral     |
| 47. | rs1452705083 | L79H  | Tolerated   | 0.06 | benign            | 0.162 | -3.921 | Deleterious |
| 48. | rs1322757890 | H81R  | Tolerated   | 0.46 | benign            | 0.012 | -0.861 | Neutral     |
| 49. | rs1296287868 | H81Y  | Tolerated   | 0.59 | benign            | 0.029 | -1.593 | Neutral     |
| 50. | rs760290715  | D84N  | Tolerated   | 0.2  | benign            | 0.059 | -1.909 | Neutral     |
| 51. | rs777056924  | R85G  | Tolerated   | 0.6  | benign            | 0     | 2.910  | Neutral     |
| 52. | rs1433184403 | G86D  | Tolerated   | 0.17 | benign            | 0.093 | -1.061 | Neutral     |
| 53. | rs201043191  | V88M  | Tolerated   | 0.4  | benign            | 0.059 | -0.489 | Neutral     |
| 54. | rs201043191  | V88L  | Tolerated   | 0.33 | benign            | 0.02  | -0.613 | Neutral     |
| 55. | rs562062613  | V88G  | Deleterious | 0    | possibly damaging | 0.549 | -5.219 | Deleterious |
| 56. | rs1401886733 | A91V  | Tolerated   | 0.06 | probably damaging | 0.983 | -3.579 | Deleterious |
| 57. | rs1016457057 | R92H  | Deleterious | 0    | probably damaging | 0.986 | -4.789 | Deleterious |
| 58. | rs759839415  | R92C  | Deleterious | 0    | probably damaging | 0.996 | -7.316 | Deleterious |
| 59. | rs905216603  | V93M  | Deleterious | 0    | probably damaging | 0.927 | -1.895 | Neutral     |
| 60. | rs1286634889 | C96Y  | Deleterious | 0    | probably damaging | 0.99  | -9.158 | Deleterious |
| 61. | rs1286634889 | C96F  | Deleterious | 0    | probably damaging | 0.979 | -9.263 | Deleterious |
| 62. | rs368827427  | V97M  | Deleterious | 0.01 | probably damaging | 0.986 | -2.947 | Deleterious |
| 63. | rs1012536290 | M100L | Tolerated   | 0.12 | benign            | 0.009 | -1.316 | Neutral     |
| 64. | rs1225289402 | N101I | Deleterious | 0    | probably damaging | 0.918 | -6.337 | Deleterious |
| 65. | rs1270235483 | P103L | Tolerated   | 0.16 | benign            | 0.034 | -2.477 | Neutral     |
| 66. | rs1216398771 | E106D | Deleterious | 0.02 | probably damaging | 0.946 | -2.474 | Neutral     |
| 67. | rs761196403  | E106Q | Tolerated   | 0.39 | possibly damaging | 0.652 | -1.316 | Neutral     |
| 68. | rs765493477  | R110Q | Tolerated   | 1    | benign            | 0.001 | 0.811  | Neutral     |
| 69. | rs1230794805 | R110W | Deleterious | 0.01 | possibly damaging | 0.663 | -2.447 | Neutral     |
| 70. | rs1158635929 | E111G | Deleterious | 0.03 | benign            | 0.024 | -4.905 | Deleterious |
| 71. | rs1412372476 | E111D | Tolerated   | 0.08 | possibly damaging | 0.547 | -2.358 | Neutral     |

|     |              |       |             |      |                   |       |        |             |
|-----|--------------|-------|-------------|------|-------------------|-------|--------|-------------|
| 72. | rs1411814496 | E111K | Tolerated   | 0.06 | benign            | 0.041 | -2.179 | Neutral     |
| 73. | rs981085448  | Y115H | Tolerated   | 0.07 | benign            | 0.072 | -2.825 | Deleterious |
| 74. | rs1407328186 | Y115F | Tolerated   | 0.3  | possibly damaging | 0.907 | -1.386 | Neutral     |
| 75. | rs372525536  | K116E | Tolerated   | 0.21 | benign            | 0.009 | 0.017  | Neutral     |
| 76. | rs772974788  | R119G | Deleterious | 0    | possibly damaging | 0.806 | -4.575 | Deleterious |
| 77. | rs772974788  | R119W | Deleterious | 0    | probably damaging | 0.988 | -6.254 | Deleterious |
| 78. | rs377039339  | R119Q | Deleterious | 0.02 | benign            | 0.263 | -2.546 | Deleterious |

**Table S2:** Structure-based predictions of destabilizing nsSNPs in *TEN1* gene using STRUM, mCSM, SDM2, DUET and PopMuSiC.

| S. No. | Variant ID   | Variants | STRUM            |               | mCSM             |               | SDM2             |               | DUET             |               | PoPMuSiC         |               |
|--------|--------------|----------|------------------|---------------|------------------|---------------|------------------|---------------|------------------|---------------|------------------|---------------|
|        |              |          | Score (Kcal/mol) | Remark        | Score (Kcal/mol) | Remark        | Score (Kcal/mol) | Remark        | Score (Kcal/mol) | Remark        | Score (Kcal/mol) | Remark        |
| 1.     | rs1322628164 | M2V      | 0.07             | Stabilizing   | 0.0              | Destabilizing | 0.0              | Destabilizing | 0.102            | Stabilizing   | -0.349           | Stabilizing   |
| 2.     | rs892524367  | P4L      | -0.11            | Destabilizing | -0.307           | Destabilizing | -0.04            | Destabilizing | 0.007            | Stabilizing   | 0.402            | Destabilizing |
| 3.     | rs989236496  | P6A      | 0.42             | Stabilizing   | -0.369           | Destabilizing | -0.2             | Destabilizing | -0.094           | Destabilizing | 0.888            | Destabilizing |
| 4.     | rs1212831970 | Y9C      | 0.58             | Stabilizing   | -1.12            | Destabilizing | 0.06             | Stabilizing   | -0.932           | Destabilizing | 1.283            | Destabilizing |
| 5.     | rs1247295822 | P12L     | 0.57             | Stabilizing   | -0.348           | Destabilizing | 3.38             | Stabilizing   | 0.677            | Stabilizing   | -1.417           | Stabilizing   |
| 6.     | rs1333358260 | W13G     | -1.71            | Destabilizing | -3.084           | Destabilizing | -0.77            | Destabilizing | -2.655           | Destabilizing | 3.096            | Destabilizing |
| 7.     | rs1224481693 | E14D     | -0.15            | Destabilizing | -1.146           | Destabilizing | -0.58            | Destabilizing | -0.954           | Destabilizing | 1.620            | Destabilizing |
| 8.     | rs1175908725 | V15 F    | -0.42            | Destabilizing | -1.421           | Destabilizing | -1.19            | Destabilizing | -1.626           | Destabilizing | 1.076            | Destabilizing |
| 9.     | rs759172427  | A17V     | 0.24             | Stabilizing   | -0.205           | Destabilizing | -0.95            | Destabilizing | -0.169           | Destabilizing | 0.498            | Destabilizing |
| 10.    | rs1328038606 | G18V     | -0.6             | Destabilizing | -0.357           | Destabilizing | -1.6             | Destabilizing | -0.527           | Destabilizing | 1.123            | Destabilizing |
| 11.    | rs964588646  | G23E     | -0.43            | Destabilizing | -0.938           | Destabilizing | -2.58            | Destabilizing | -1.266           | Destabilizing | 0.372            | Destabilizing |
| 12.    | rs376979590  | T25M     | 0.35             | Stabilizing   | -0.005           | Destabilizing | -0.78            | Destabilizing | -0.086           | Destabilizing | 0.414            | Destabilizing |
| 13.    | rs1262136645 | L26P     | -2.9             | Destabilizing | -1.923           | Destabilizing | -4.31            | Destabilizing | -2.62            | Destabilizing | 3.266            | Destabilizing |
| 14.    | rs1392752852 | T28I     | 0.1              | Stabilizing   | 0.397            | Stabilizing   | 1.81             | Stabilizing   | 1.113            | Stabilizing   | -0.114           | Stabilizing   |
| 15.    | rs1485869353 | F29Y     | -0.42            | Destabilizing | -0.676           | Destabilizing | -0.76            | Destabilizing | -0.467           | Destabilizing | 1.553            | Destabilizing |
| 16.    | rs1223059981 | D36N     | 0.26             | Stabilizing   | -1.046           | Destabilizing | -0.18            | Destabilizing | -0.748           | Destabilizing | 0.442            | Destabilizing |
| 17.    | rs1250997925 | R41S     | 0.38             | Stabilizing   | -1.773           | Destabilizing | -1.32            | Destabilizing | -1.893           | Destabilizing | 1.910            | Destabilizing |
| 18.    | rs1481928740 | V42L     | -0.09            | Destabilizing | -0.165           | Destabilizing | -1.5             | Destabilizing | -0.104           | Destabilizing | 1.053            | Destabilizing |
| 19.    | rs1178755431 | L44V     | -1.07            | Destabilizing | -1.734           | Destabilizing | -1.58            | Destabilizing | -1.87            | Destabilizing | 1.519            | Destabilizing |
| 20.    | rs1251492109 | M45V     | 1.28             | Stabilizing   | -1.02            | Destabilizing | 1.39             | Stabilizing   | -0.164           | Destabilizing | 0.786            | Destabilizing |
| 21.    | rs1268278855 | M45T     | 1.25             | Stabilizing   | -0.897           | Destabilizing | 0.02             | Stabilizing   | -0.283           | Destabilizing | 1.073            | Destabilizing |
| 22.    | rs11544990   | A46S     | 0.26             | Stabilizing   | -1.843           | Destabilizing | -2.47            | Destabilizing | -1.974           | Destabilizing | 1.151            | Destabilizing |
| 23.    | rs750169662  | H48Y     | 0.12             | Stabilizing   | 1.401            | Stabilizing   | -0.16            | Destabilizing | 1.343            | Stabilizing   | -0.365           | Stabilizing   |
| 24.    | rs1425396642 | G49R     | 0.39             | Stabilizing   | -0.176           | Destabilizing | -0.68            | Destabilizing | -0.023           | Destabilizing | -0.100           | Stabilizing   |
| 25.    | rs1055013538 | D51N     | 0.53             | Stabilizing   | 0.107            | Stabilizing   | 0.06             | Stabilizing   | 0.336            | Stabilizing   | 0.555            | Destabilizing |
| 26.    | rs1412009927 | C58Y     | -1.76            | Destabilizing | -0.933           | Destabilizing | -1.60            | Destabilizing | -1.099           | Destabilizing | 1.219            | Destabilizing |
| 27.    | rs1373602232 | T59I     | 0.22             | Stabilizing   | 0.073            | Stabilizing   | 0.61             | Stabilizing   | 0.435            | Stabilizing   | 0.294            | Destabilizing |
| 28.    | rs1360895135 | L61F     | -0.93            | Destabilizing | -0.587           | Destabilizing | -0.05            | Destabilizing | -0.598           | Destabilizing | -0.041           | Stabilizing   |
| 29.    | rs977512123  | L61M     | -0.64            | Destabilizing | -0.471           | Destabilizing | -0.48            | Destabilizing | -0.538           | Destabilizing | -0.200           | Stabilizing   |
| 30.    | rs1032051988 | L61W     | -0.8             | Destabilizing | -0.597           | Destabilizing | -0.43            | Destabilizing | -0.717           | Destabilizing | 0.091            | Destabilizing |
| 31.    | rs889310547  | P64T     | 0.51             | Stabilizing   | -0.718           | Destabilizing | -0.38            | Destabilizing | -0.437           | Destabilizing | 0.105            | Destabilizing |
| 32.    | rs543068875  | H66R     | 0.44             | Stabilizing   | -0.384           | Destabilizing | -0.11            | Destabilizing | -0.167           | Destabilizing | -0.375           | Stabilizing   |
| 33.    | rs998232737  | A67T     | -0.08            | Destabilizing | -0.941           | Destabilizing | -0.62            | Destabilizing | -0.724           | Destabilizing | 0.494            | Destabilizing |
| 34.    | rs998232737  | A67S     | 0.28             | Stabilizing   | -1.142           | Destabilizing | -1.38            | Destabilizing | -1.087           | Destabilizing | 0.792            | Destabilizing |
| 35.    | rs200875806  | Q68H     | 0.4              | Stabilizing   | -0.579           | Destabilizing | 1.08             | Stabilizing   | -0.294           | Destabilizing | -0.087           | Stabilizing   |
| 36.    | rs975857712  | V69M     | 0.0              | Stabilizing   | -0.332           | Destabilizing | -0.45            | Destabilizing | -0.38            | Destabilizing | -0.083           | Stabilizing   |
| 37.    | rs951187486  | G70A     | -0.7             | Destabilizing | -0.623           | Destabilizing | -2.71            | Destabilizing | -1.083           | Destabilizing | 0.500            | Destabilizing |
| 38.    | rs1180274799 | G70S     | -0.83            | Destabilizing | -1.007           | Destabilizing | -4.3             | Destabilizing | -1.596           | Destabilizing | 0.812            | Destabilizing |
| 39.    | rs1445270614 | Y73C     | 0.3              | Stabilizing   | -1.875           | Destabilizing | -1.42            | Destabilizing | -2.004           | Destabilizing | 2.591            | Destabilizing |
| 40.    | rs374268204  | I74M     | -0.4             | Destabilizing | -0.739           | Destabilizing | -0.97            | Destabilizing | -0.765           | Destabilizing | 1.326            | Destabilizing |
| 41.    | rs370881785  | I74V     | 0.3              | Stabilizing   | -1.304           | Destabilizing | 0.29             | Stabilizing   | -0.885           | Destabilizing | 1.177            | Destabilizing |
| 42.    | rs929018097  | V75I     | 0.16             | Stabilizing   | -0.683           | Destabilizing | -0.6             | Destabilizing | -0.438           | Destabilizing | 0.460            | Destabilizing |

|     |              |       |       |               |        |               |       |               |        |               |        |               |
|-----|--------------|-------|-------|---------------|--------|---------------|-------|---------------|--------|---------------|--------|---------------|
| 43. | rs1358892195 | G77R  | -1.35 | Destabilizing | -1.22  | Destabilizing | -2.73 | Destabilizing | -1.215 | Destabilizing | 1.717  | Destabilizing |
| 44. | rs1300674402 | E78D  | -0.0  | Destabilizing | -1.248 | Destabilizing | -1.06 | Destabilizing | -1.188 | Destabilizing | 0.449  | Destabilizing |
| 45. | rs1384576801 | L79I  | -0.29 | Destabilizing | -1.207 | Destabilizing | 0.77  | Stabilizing   | -0.652 | Destabilizing | 0.719  | Destabilizing |
| 46. | rs1384576801 | L79F  | -0.52 | Destabilizing | -1.672 | Destabilizing | -0.66 | Destabilizing | -1.634 | Destabilizing | 1.380  | Destabilizing |
| 47. | rs1452705083 | L79H  | -1.74 | Destabilizing | -1.851 | Destabilizing | -1.44 | Destabilizing | -1.883 | Destabilizing | 3.088  | Destabilizing |
| 48. | rs1322757890 | H81R  | 0.65  | Stabilizing   | 0.004  | Stabilizing   | -0.24 | Destabilizing | 0.201  | Stabilizing   | 0.249  | Destabilizing |
| 49. | rs1296287868 | H81Y  | 0.56  | Stabilizing   | 0.78   | Stabilizing   | -0.16 | Destabilizing | 0.834  | Stabilizing   | 0.210  | Destabilizing |
| 50. | rs760290715  | D84N  | 0.01  | Stabilizing   | 0.072  | Destabilizing | 0.02  | Destabilizing | 0.188  | Destabilizing | -0.186 | Stabilizing   |
| 51. | rs777056924  | R85G  | 1.45  | Stabilizing   | -0.136 | Destabilizing | 2.6   | Stabilizing   | 0.524  | Stabilizing   | -0.113 | Stabilizing   |
| 52. | rs1433184403 | G86D  | -0.26 | Destabilizing | -0.813 | Destabilizing | -3.66 | Destabilizing | -1.207 | Destabilizing | 0.809  | Destabilizing |
| 53. | rs201043191  | V88M  | -0.67 | Destabilizing | -1.029 | Destabilizing | -2.17 | Destabilizing | -1.398 | Destabilizing | 1.783  | Destabilizing |
| 54. | rs201043191  | V88L  | 0.11  | Stabilizing   | -1.011 | Destabilizing | -1.54 | Destabilizing | -1.048 | Destabilizing | 1.026  | Destabilizing |
| 55. | rs562062613  | V88G  | -1.59 | Destabilizing | -2.268 | Destabilizing | -3.2  | Destabilizing | -2.813 | Destabilizing | 4.095  | Destabilizing |
| 56. | rs1401886733 | A91V  | -0.86 | Destabilizing | -0.638 | Destabilizing | 0.95  | Destabilizing | -0.005 | Destabilizing | 0.415  | Destabilizing |
| 57. | rs1016457057 | R92H  | -0.45 | Destabilizing | -0.965 | Destabilizing | 0.28  | Stabilizing   | -0.722 | Destabilizing | 0.166  | Destabilizing |
| 58. | rs759839415  | R92C  | -0.14 | Destabilizing | -0.52  | Destabilizing | 0.02  | Stabilizing   | -0.368 | Destabilizing | 0.248  | Destabilizing |
| 59. | rs905216603  | V93M  | -0.43 | Destabilizing | -0.462 | Destabilizing | -1.19 | Destabilizing | -0.518 | Destabilizing | 0.599  | Destabilizing |
| 60. | rs1286634889 | C96Y  | -1.25 | Destabilizing | -1.157 | Destabilizing | -0.51 | Destabilizing | -0.963 | Destabilizing | 0.905  | Destabilizing |
| 61. | rs1286634889 | C96F  | -0.67 | Destabilizing | -1.125 | Destabilizing | -0.5  | Destabilizing | -0.975 | Destabilizing | 0.201  | Destabilizing |
| 62. | rs368827427  | V97M  | -0.11 | Destabilizing | -0.325 | Destabilizing | -0.26 | Destabilizing | -0.24  | Destabilizing | 0.367  | Destabilizing |
| 63. | rs1012536290 | M100L | -0.06 | Destabilizing | -0.518 | Destabilizing | 0.39  | Stabilizing   | -0.104 | Destabilizing | 0.749  | Destabilizing |
| 64. | rs1225289402 | N101I | -0.12 | Destabilizing | 0.197  | Stabilizing   | 0.55  | Stabilizing   | 0.485  | Stabilizing   | 0.704  | Stabilizing   |
| 65. | rs1270235483 | P103L | 0.47  | Stabilizing   | -0.43  | Destabilizing | 1.57  | Stabilizing   | 0.32   | Stabilizing   | -0.452 | Stabilizing   |
| 66. | rs1216398771 | E106D | 0.23  | Stabilizing   | -1.132 | Destabilizing | -0.86 | Destabilizing | -1.013 | Destabilizing | 1.312  | Destabilizing |
| 67. | rs761196403  | E106Q | 0.6   | Stabilizing   | -0.148 | Destabilizing | -0.69 | Destabilizing | 0.076  | Stabilizing   | 0.273  | Destabilizing |
| 68. | rs765493477  | R110Q | 0.13  | Stabilizing   | -0.336 | Destabilizing | -0.10 | Destabilizing | -0.062 | Destabilizing | -0.115 | Stabilizing   |
| 69. | rs1230794805 | R110W | -0.09 | Destabilizing | -0.278 | Destabilizing | -0.32 | Destabilizing | -0.491 | Destabilizing | 0.439  | Destabilizing |
| 70. | rs1158635929 | E111G | 0.57  | Stabilizing   | -1.191 | Destabilizing | -1.68 | Destabilizing | -1.429 | Destabilizing | 1.426  | Destabilizing |
| 71. | rs1412372476 | E111D | -0.19 | Destabilizing | -0.998 | Destabilizing | -1.13 | Destabilizing | -0.935 | Destabilizing | 0.709  | Destabilizing |
| 72. | rs1411814496 | E111K | -0.17 | Destabilizing | -0.476 | Destabilizing | -1.0  | Destabilizing | -0.303 | Destabilizing | 0.497  | Destabilizing |
| 73. | rs981085448  | Y115H | 0.23  | Stabilizing   | -0.256 | Destabilizing | -0.26 | Destabilizing | 0.089  | Stabilizing   | -0.331 | Stabilizing   |
| 74. | rs1407328186 | Y115F | 0.15  | Stabilizing   | -0.625 | Destabilizing | 0.12  | Stabilizing   | -0.186 | Destabilizing | 0.332  | Destabilizing |
| 75. | rs372525536  | K116E | -0.12 | Destabilizing | 0.114  | Stabilizing   | 0.99  | Stabilizing   | 0.718  | Stabilizing   | -0.569 | Stabilizing   |
| 76. | rs772974788  | R119G | 1.39  | Stabilizing   | -0.102 | Destabilizing | 0.0   | Destabilizing | -0.074 | Destabilizing | -0.202 | Stabilizing   |
| 77. | rs772974788  | R119W | -0.02 | Destabilizing | -0.415 | Destabilizing | 0.0   | Destabilizing | -0.586 | Destabilizing | -0.040 | Stabilizing   |
| 78. | rs377039339  | R119Q | 0.67  | Stabilizing   | -0.103 | Destabilizing | 0.0   | Destabilizing | 0.026  | Stabilizing   | -0.784 | Stabilizing   |
